# Supplementary material
Source: PubMed Central journal article supplement (PMC3992946)
Supplement: NIHMS565554-supplement-supp_fig_1.pdf [file NIHMS565554-supplement-supp_fig_1.pdf]

# Suppl. Figure 1

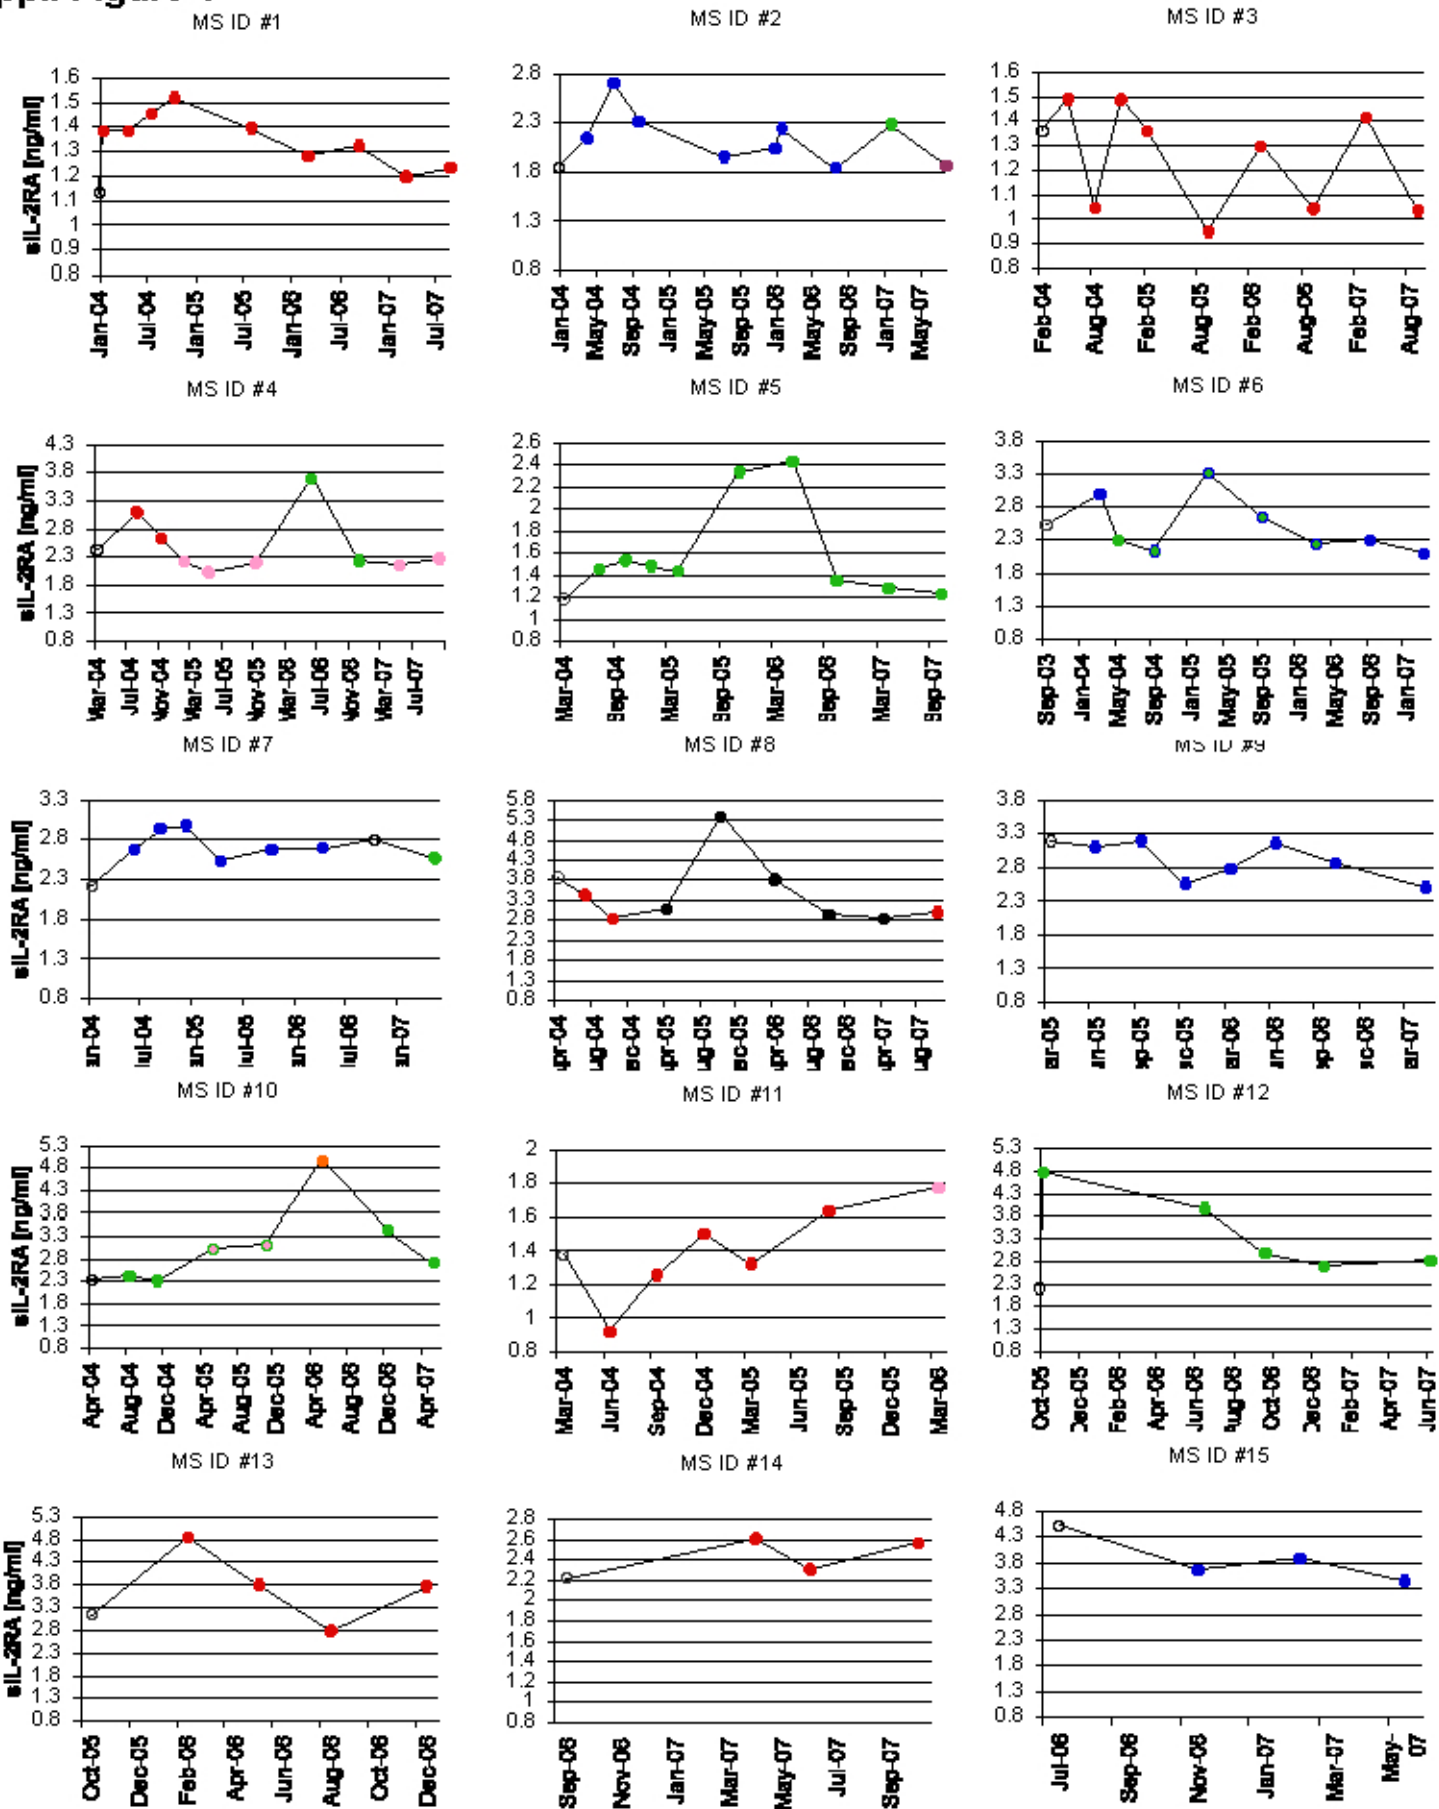

- No treatment
- Interferon beta-1a (Avonex)
- Glatiramer Acetate (Copaxone)
- Cyclophosphamide (Cytoxin)
- Rebif + Avonex
- Steroids
- Daclizumab (Zenepax)
- Rebif + Steroids
- Interferon beta-1a (Rebif)
- Rituximab (Rituxan)
